# Supplementary material for: Spherical Silica Modified with Magnesium and Ruthenium—Synthesis, Characterization and Catalytic Properties
Source: MDPI journal article supplement (doi:10.3390/ma14237378), 2021-12-02
Supplement: s1 [file s1]

# Spherical Silica Modified with Magnesium and Ruthenium— Synthesis, Characterization and Catalytic Properties

Kalina Grzelak \* and Maciej Trejda

Department of Heterogeneous Catalysis, Faculty of Chemistry, Adam Mickiewicz University,  
Uniwersytetu Poznańskiego 8, 61-614 Poznań, Poland; tmaciej@amu.edu.pl

\* Correspondence: kalina.grzelak@amu.edu.pl

## List of content:

**Figure S1.** SEM image of spherical nonporous silica.

**Figure S2.** SEM images of the final materials Ru/NS/5Mg/NS and Ru/NS/6Mg/NS.

**Figure S3.** The SEM-EDS analysis of Ru/NS/3Mg/NS: (a) SEM image, (b) Mg K scanning, (c) Ru L scanning.

**Figure S4.** XPS spectra of the catalyst in Ru 3p and Ru 3d region.

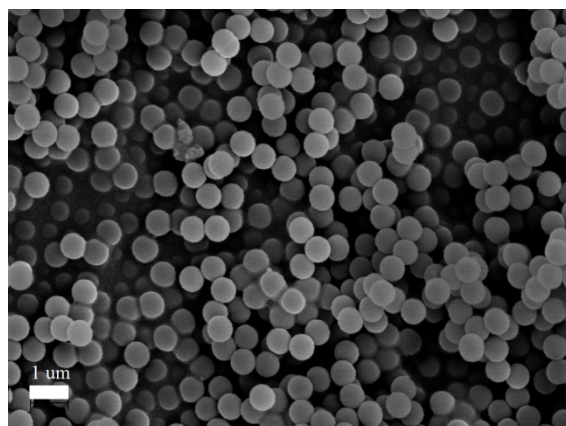

**Figure S1.** SEM image of spherical nonporous silica. (Scanning electron microscopy (SEM) image was carried out with a Quanta 250 FEG, FEI microscope operating at 10 kV.)

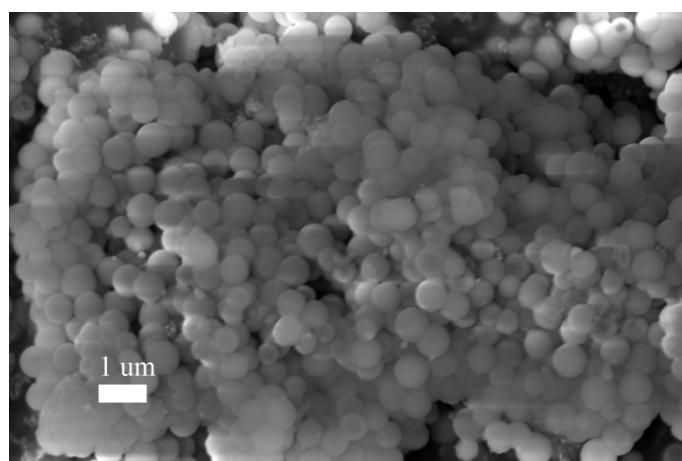

Ru/NS/5Mg/NS

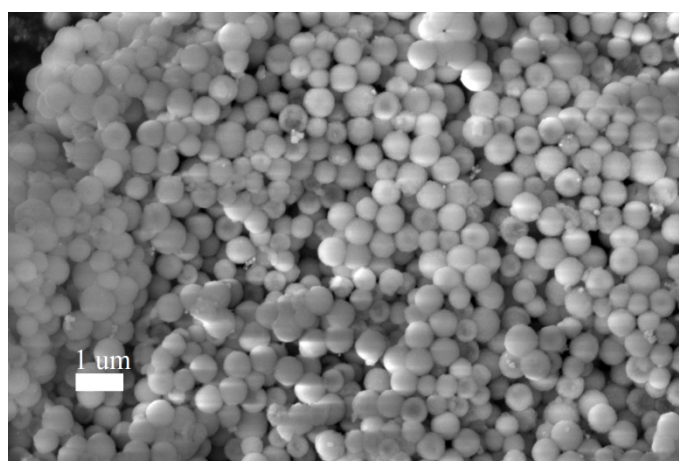

Ru/NS/6Mg/NS

**Figure S2.** SEM images of the final materials Ru/NS/5Mg/NS and Ru/NS/6Mg/NS.

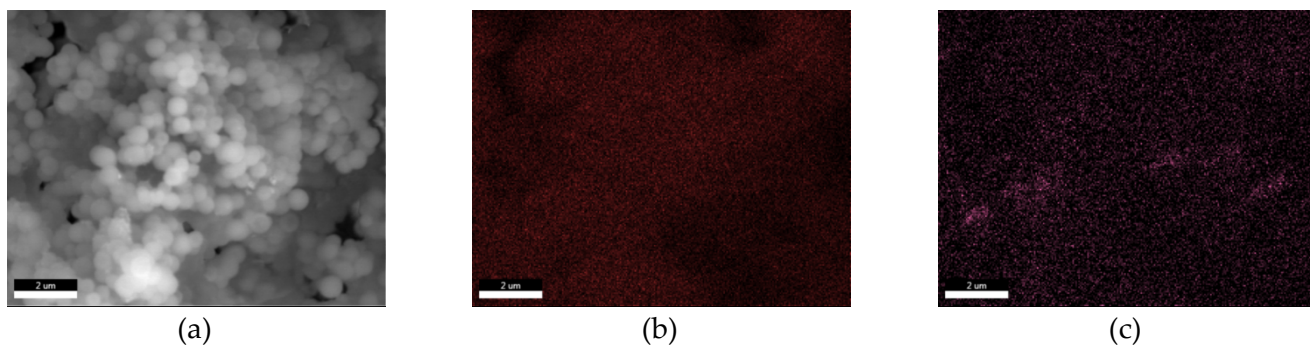

**Figure S3.** The SEM-EDS analysis of Ru/NS/3Mg/NS: (a) SEM image, (b) Mg K scanning, (c) Ru L scanning.

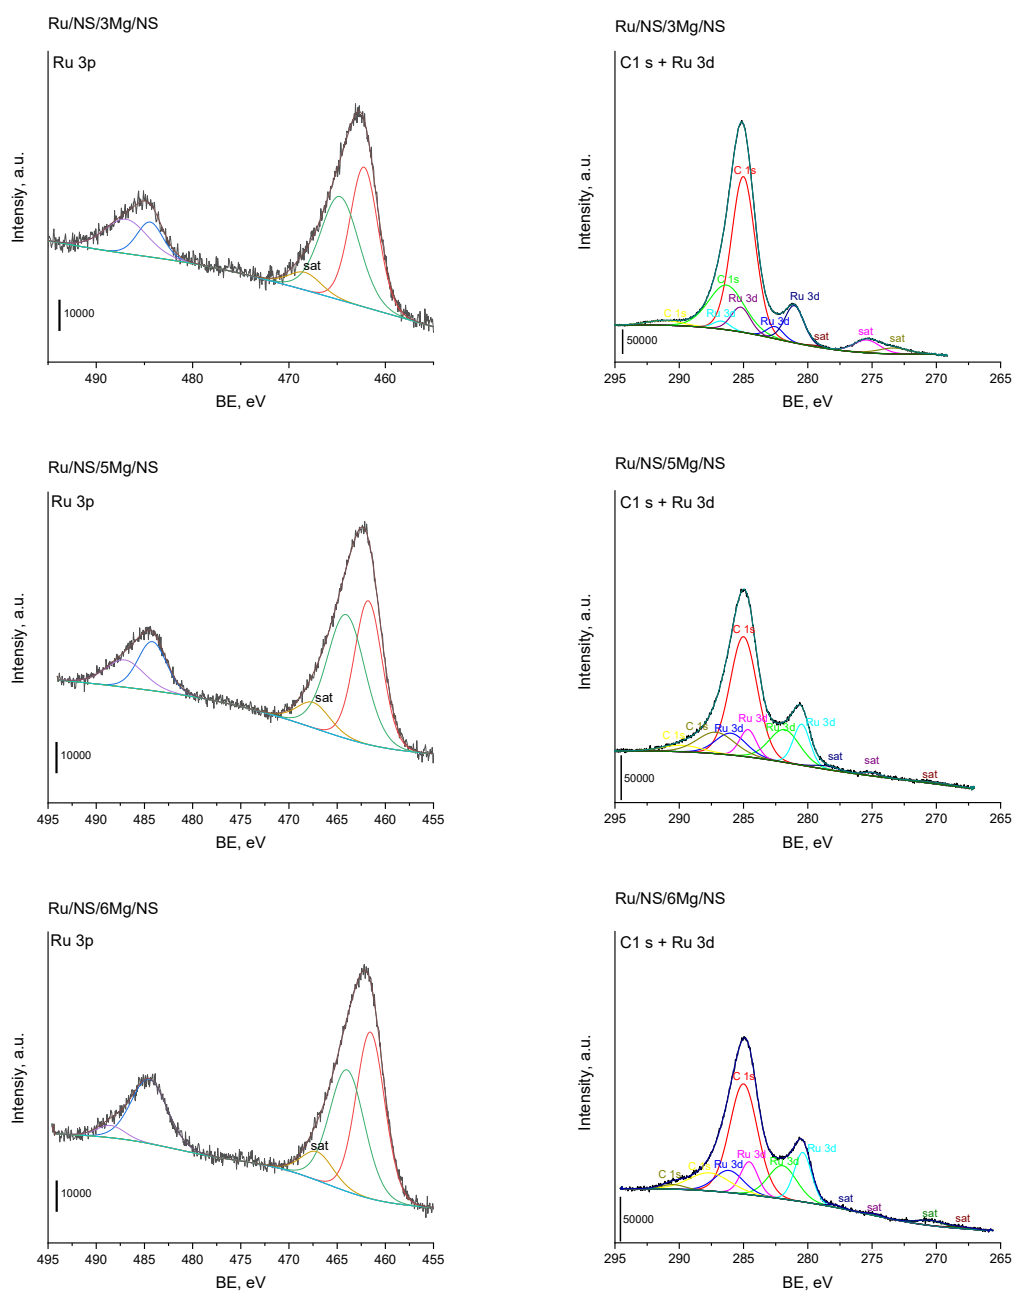

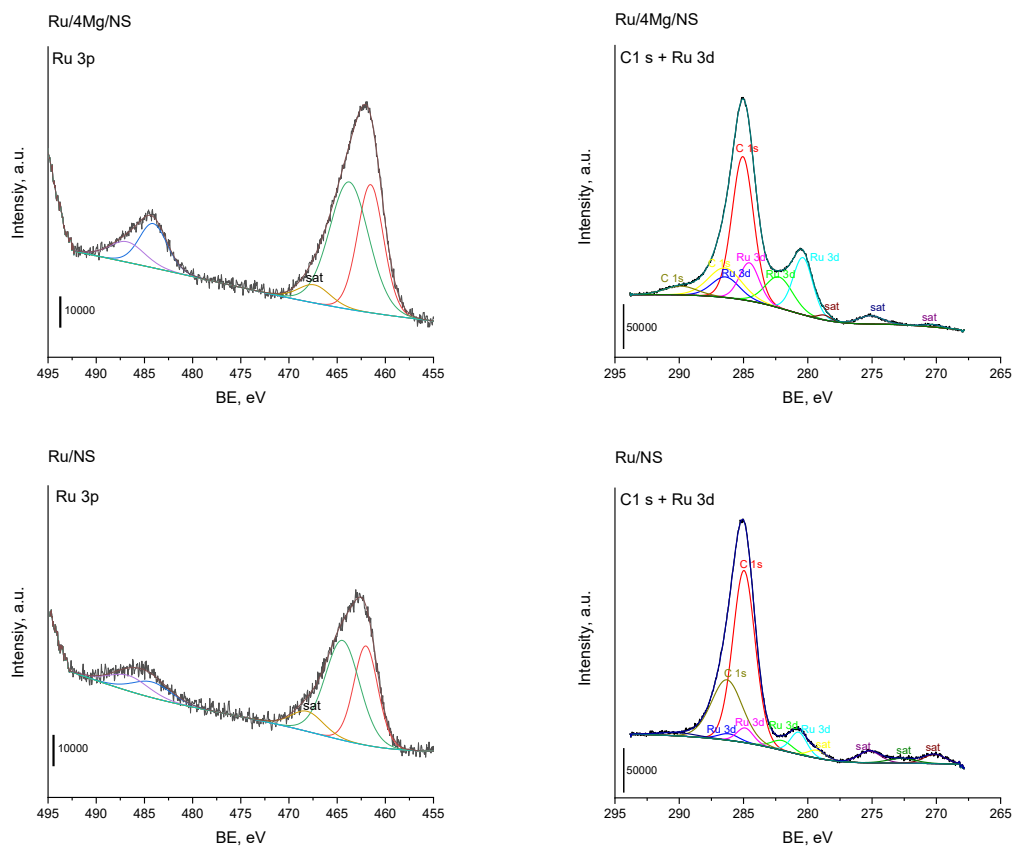

**Figure S4.** XPS spectra of the catalyst in Ru 3p and Ru 3d region.
